# Supplementary material for: Sandwich-type silicotungstate modified TiO2 microspheres for enhancing light harvesting and reducing electron recombination in dye-sensitized solar cells
Source: Royal Society of Chemistry journal article supplement (doi:10.1039/c6qi00570e), 2017-01-01
Supplement: c6qi00570e1.pdf [file c6qi00570e1.pdf]

## Supporting Information

### **Sandwich-type silicotungstates modified TiO<sub>2</sub> microspheres for enhancing light harvesting and reducing electron recombination in Dye-Sensitized Solar Cells**

Yi-Jing Wang, Wei-Lin Chen,\* Li Chen, Xiao-Tao Zheng, Sha-Sha Xu, and En-Bo Wang\*

<sup>a</sup>Key laboratory of Polyoxometalate Science of Ministry of Education, Department of Chemistry, Northeast Normal University, Renmin Street No.5268, Changchun, Jilin, 130024, P. R. China. E-mail: chenwl@nenu.edu.cn (W. L. Chen), wangeb889@nenu.edu.cn (E.B. Wang), Tel: +86-431-85098787.

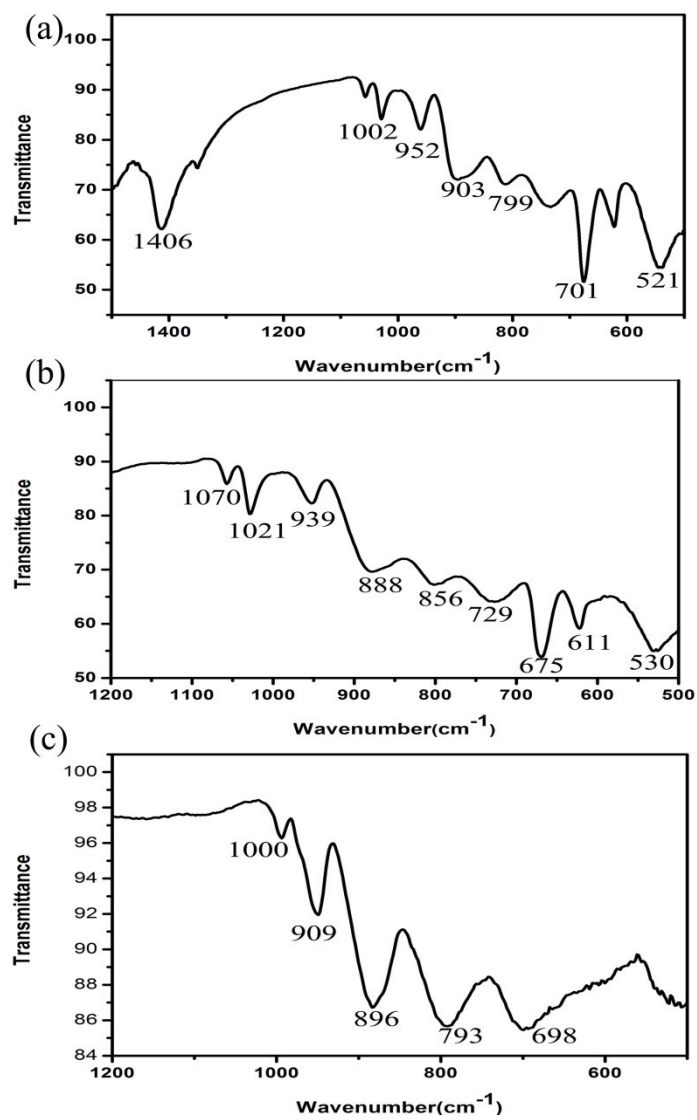

**Fig. S1** (a) FT-IR of Ni<sub>4</sub> (b) FT-IR of Ni<sub>1</sub> (c) FT-IR of Co<sub>4</sub>

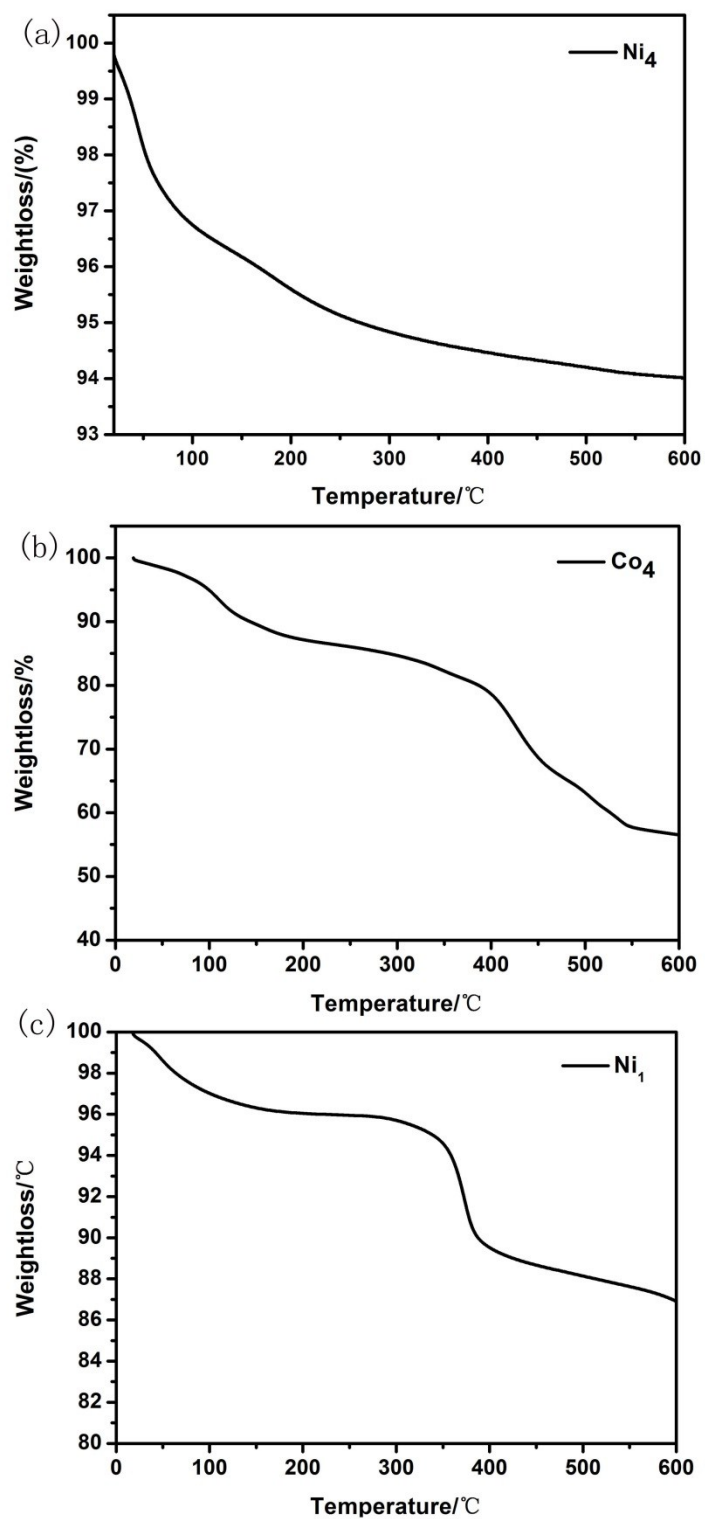

**Fig. S2** (a) TGA curve of Ni<sub>4</sub>. (b) TGA curve of Co<sub>4</sub>. (c) TGA curve of Ni<sub>1</sub>.

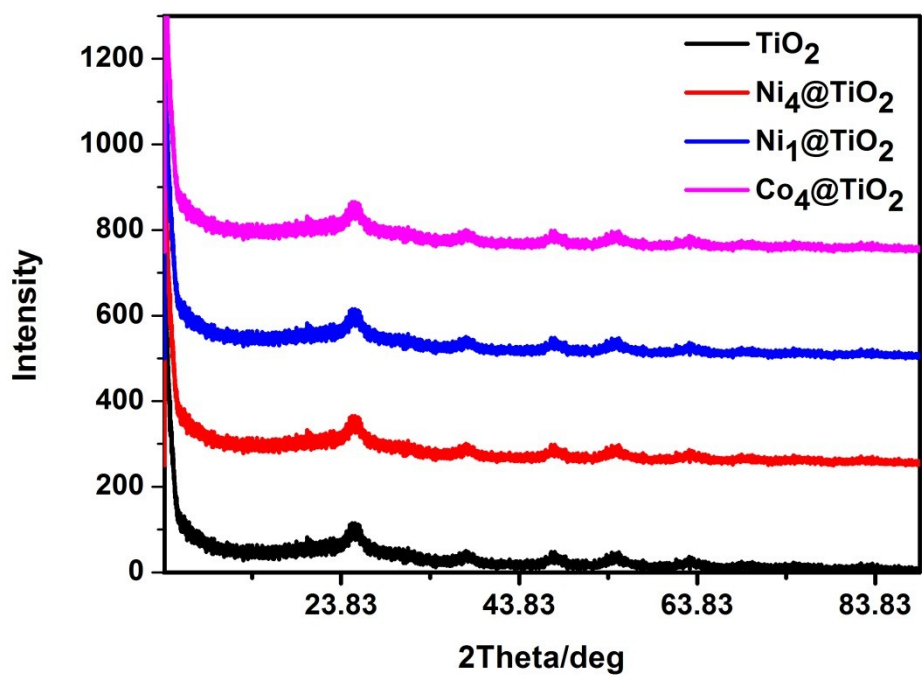

Fig. S3 XRD of TiO<sub>2</sub>, 0.8% Ni<sub>4</sub>@TiO<sub>2</sub>, 0.8% Ni<sub>1</sub>@TiO<sub>2</sub> and 0.8% Co<sub>4</sub>@TiO<sub>2</sub>

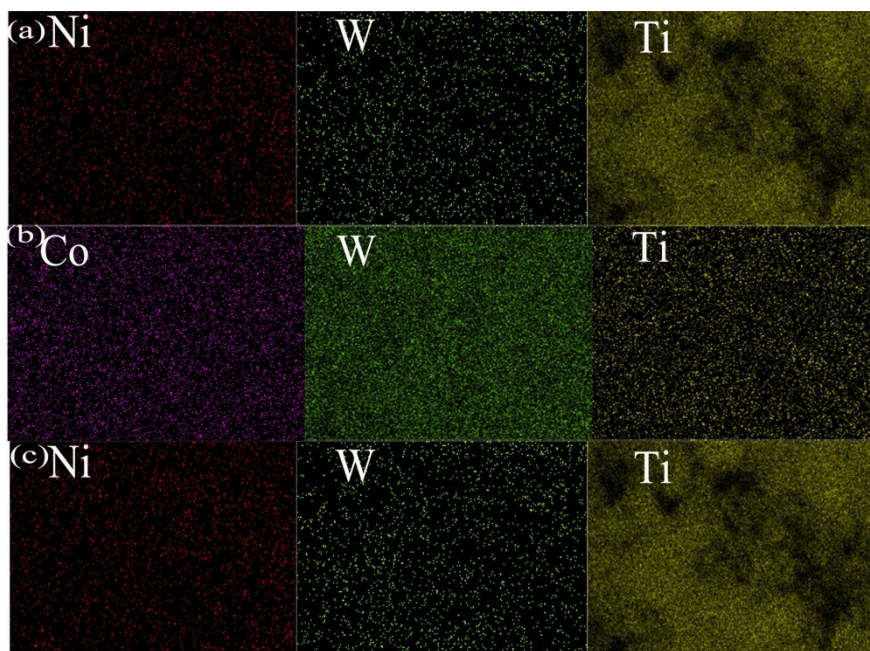

**Fig. S4** (a) EDS mapping of Ni, W and Ti from  $\text{Ni}_4$ . (b) EDS mapping of Ni, W and Co from  $\text{Co}_4$ . (c) EDS mapping of Ni, W and Ti from  $\text{Ni}_1$ .

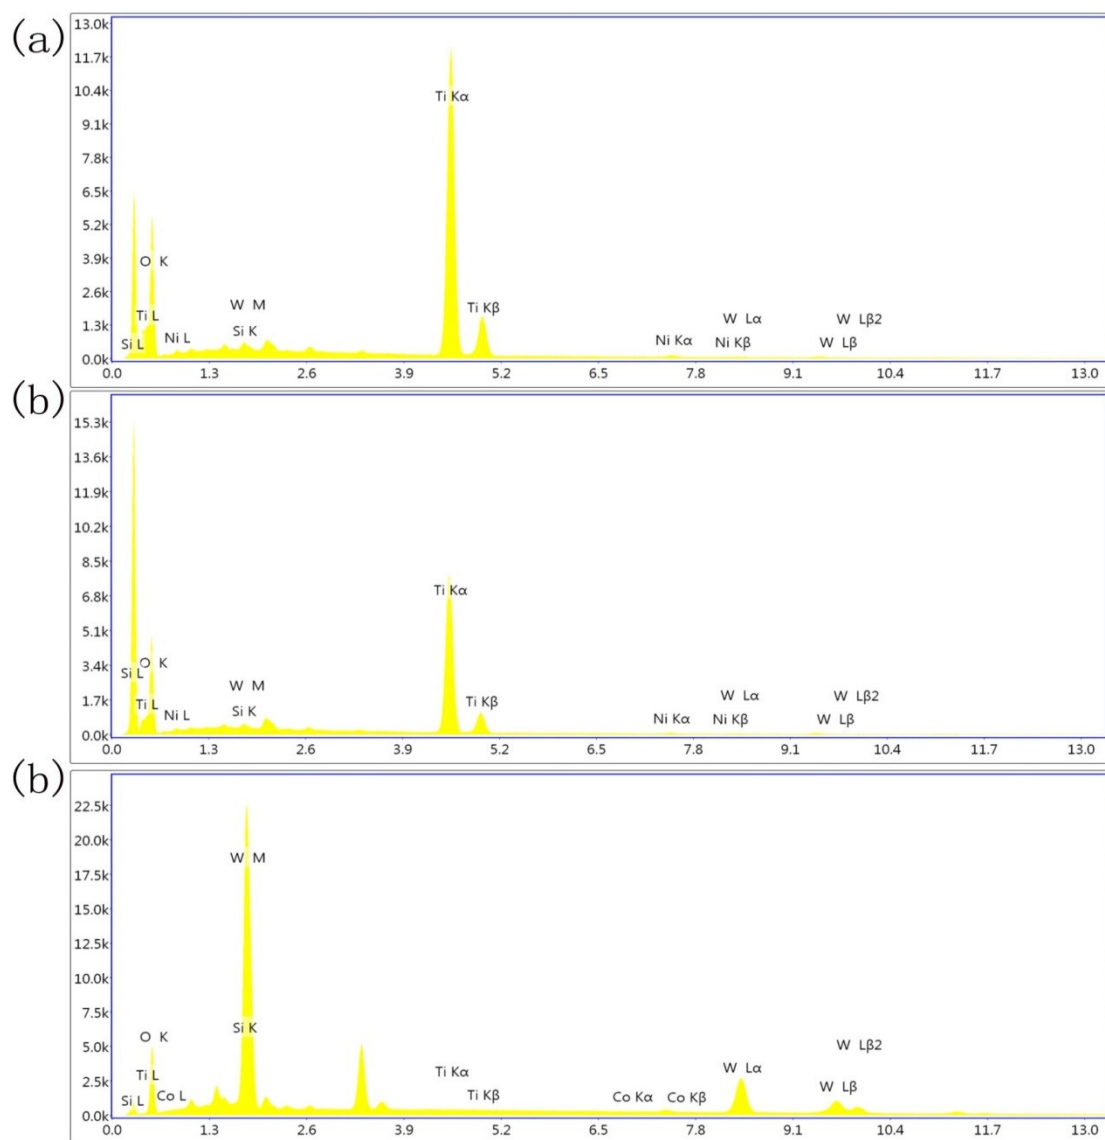

**Fig. S5** (a) EDS of 0.8% Ni<sub>4</sub>@TiO<sub>2</sub>. (b) EDS of 0.8% Ni<sub>1</sub>@TiO<sub>2</sub>. (c) EDS of 0.8% Co<sub>4</sub>@TiO<sub>2</sub>
